# Supplementary material
Source: ML conference proceedings conference paper supplement (https://openaccess.thecvf.com/content/CVPR2023/html/Maralan_Computational_Flash_Photography_CVPR_2023_paper.html)
Supplement: Supplementary file 3 [file Maralan_Computational_Flash_Photography_CVPR_2023_supplemental.zip]

Archive with 2 entries (2 files):
- flash_dataset.pdf
- flash_results.pdf
